# Supplementary material
Source: publisher figshare collection journal article supplement (https://sage.figshare.com/ndownloader/files/14080436)
Supplement: Supplementary file 1 [file 14080436]

Supplement.

Observed additional baseline characteristics for patients in pre- and post-intervention periods.

| Characteristic | All patients | | Before | | After | |
| --- | --- | --- | --- | --- | --- | --- |
| N | % | N | % | N | % |
| Total | 542 | 100.0 | 246 | 100.0 | 296 | 100.0 |
| Insurance |  |  |  |  |  |  |
| National Health Insurance | 470 | 86.7 | 219 | 89.0 | 251 | 84.8 |
| Vehicle insurance | 2 | 0.4 | 0 | 0.0 | 2 | 0.7 |
| Medical aid | 55 | 10.2 | 20 | 8.1 | 35 | 11.8 |
| No Insurance | 15 | 2.8 | 7 | 2.9 | 8 | 2.7 |
| Psychiatric history |  |  |  |  |  |  |
| Yes | 203 | 37.5 | 79 | 32.1 | 124 | 41.9 |
| No | 252 | 46.5 | 93 | 37.8 | 159 | 53.7 |
| Unknown or missing | 87 | 16.1 | 74 | 30.1 | 13 | 4.4 |
| Prior suicide attempt |  |  |  |  |  |  |
| Yes | 203 | 37.5 | 79 | 32.1 | 124 | 41.9 |
| No | 252 | 46.5 | 93 | 37.8 | 159 | 53.7 |
| Unknown or missing | 87 | 16.1 | 74 | 30.1 | 13 | 4.4 |

IQR; interquartile range, ED; emergency department
